# Supplementary material for: Model-Based Assessment of the Liver Safety Profile of Acetaminophen to Support its Combination Use with Topical Diclofenac in Mild-to-Moderate Osteoarthritis Pain
Source: Springer Nature journal article supplement (doi:10.1007/s40122-023-00566-2), 2024-01-06
Supplement: MOESM1 [file 26603170]

# **Model-based assessment of the liver safety profile of acetaminophen to support its combination use with topical diclofenac in mild to moderate osteoarthritis pain**

Authors: Vidhu Sethi<sup>1</sup>, Li Qin<sup>2</sup>, Iñaki F. Trocóniz<sup>3</sup>, Luke Van der Laan<sup>4</sup>, Eugène Cox<sup>2</sup>, Oscar Della Pasqua<sup>5,6</sup>

Affiliations:

1. Medical Affairs, Haleon (formerly GSK Consumer Healthcare), Singapore
2. Quantitative Science, Certara, Princeton, USA
3. Department of Pharmaceutical Technology and Chemistry, School of Pharmacy and Nutrition, University of Navarra, Pamplona, Spain
4. University of Southern Queensland, Queensland, Australia
5. Clinical Pharmacology & Therapeutics Group, University College London, London, UK
6. Clinical Pharmacology Modelling and Simulation, GlaxoSmithKline, Brentford, UK

Corresponding author:

Vidhu Sethi

E-mail: [vidhu.x.sethi@haleon.com](mailto:vidhu.x.sethi@haleon.com)

## Supplementary Material

Supplementary Table S1. Search strategy for the evaluation of liver safety and exposure to acetaminophen.

| Area/objective                     | S. No. | Keywords                                                                                                                                                                                                                                                                                                                                                                                                                                                                 | Results<br>MEDLINE via<br>PubMed |
|------------------------------------|--------|--------------------------------------------------------------------------------------------------------------------------------------------------------------------------------------------------------------------------------------------------------------------------------------------------------------------------------------------------------------------------------------------------------------------------------------------------------------------------|----------------------------------|
| I. Intervention<br>(acetaminophen) | 1      | N-Acetyl-p-aminophenol [tiab] OR Acetamidophenol [tiab] OR N-(4-Hydroxyphenyl)acetanilide [tiab] OR "Acetaminophen"[Mesh] OR Hydroxyacetanilide [tiab] OR APAP [tiab] OR Acetaminophen [tiab] OR p-Acetamidophenol [tiab] OR p-Hydroxyacetanilide [tiab] OR Acephen [tiab] OR Acetaco [tiab] OR Tylenol [tiab] OR Anacin-3 [tiab] OR "Anacin 3" [tiab] OR Anacin3 [tiab] OR Datriil [tiab] OR Acamol [tiab] OR Algotropyl [tiab] OR paracetamol [tiab] OR Panadol [tiab] | 29,414                           |
| II. Outcomes<br>(liver safety)     | 2      | "liver toxicity" OR "hepatic toxicity" OR hepatotoxicity OR "liver safety" OR ASAT OR ALAT OR aminotransferase OR "liver injury " OR "liver injuries" OR bilirubin                                                                                                                                                                                                                                                                                                       | 186,378                          |
| III. Study design<br>(RCT)         | 3      | random* [tiab] OR "Random Allocation"[Mesh] OR "Randomized Controlled Trial" [Publication Type] OR "Single-Blind Method"[Mesh] OR "Double-Blind Method"[Mesh] OR single blind method [tiab] OR double blind method [tiab] OR randomly [tiab]                                                                                                                                                                                                                             | 1,364,326                        |
| IV. Final results                  | 4      | #1 AND #2                                                                                                                                                                                                                                                                                                                                                                                                                                                                | 5,384                            |
|                                    | 5      | #4 NOT ("Animals"[Mesh] NOT ("Animals"[Mesh] AND "Humans"[Mesh]))                                                                                                                                                                                                                                                                                                                                                                                                        | 3,174                            |
|                                    | 6      | #5 AND #3                                                                                                                                                                                                                                                                                                                                                                                                                                                                | 143                              |
|                                    | 7      | #6 AND Filters: English                                                                                                                                                                                                                                                                                                                                                                                                                                                  | 139                              |
|                                    | 8      | #5 AND Filters: Meta-Analysis, Systematic Review, English                                                                                                                                                                                                                                                                                                                                                                                                                | 28                               |
|                                    | 9      | #7 OR #8                                                                                                                                                                                                                                                                                                                                                                                                                                                                 | 153                              |

Supplementary Table S2. Inclusion criteria for the evaluation of liver safety and exposure to acetaminophen.

| PICOS framework            | Inclusion criteria                                                                                     | Exclusion criteria                                                                                                                                                             |
|----------------------------|--------------------------------------------------------------------------------------------------------|--------------------------------------------------------------------------------------------------------------------------------------------------------------------------------|
| <b>Population</b>          | Adults ( $\geq 18$ years), with no further restrictions regarding the disease type, healthy volunteers | In vitro/in vivo studies, animals' studies, children; patients who overdose paracetamol; patients consuming alcohol (including heavy/moderate drinkers, chronic drinkers etc.) |
| <b>Intervention</b>        | Oral acetaminophen                                                                                     | Intravenous acetaminophen                                                                                                                                                      |
| <b>Comparator</b>          | NA                                                                                                     |                                                                                                                                                                                |
| <b>Outcomes</b>            | Hepatic aminotransferases (ALT and AST)                                                                |                                                                                                                                                                                |
| <b>Duration of therapy</b> | At least two weeks                                                                                     | Less than two weeks (14 days)                                                                                                                                                  |
| <b>Study types</b>         | RCTs                                                                                                   | SLRs, non-RCTS, case studies, observational studies                                                                                                                            |
| <b>Language</b>            | English                                                                                                | Others                                                                                                                                                                         |

ALT: alanine transaminase, AST: aspartate transaminase, NA: Not applicable, RCT: randomized clinical trials

Supplementary Table S3. Summary of selected liver safety studies stratified by treatment.

| Treatment                      | Study | Arm | Threshold                    |
|--------------------------------|-------|-----|------------------------------|
| Acetaminophen                  | 15    | 17  | >0-1 ULN, >1.5-2 ULN, >3 ULN |
| Acetaminophen+propylene glycol | 1     | 1   | >0-1 ULN                     |
| Diclofenac+misoprostol         | 1     | 1   | >0-1 ULN, >1.5-2 ULN, >3 ULN |
| Ibuprofen                      | 2     | 3   | >0-1 ULN, >1.5-2 ULN, >3 ULN |
| Ibuprofen+acetaminophen        | 1     | 2   | >1.5-2 ULN, >3 ULN           |
| Levobunolol                    | 1     | 1   | >3 ULN                       |
| Naproxen                       | 1     | 1   | >1.5-2 ULN                   |
| Placebo                        | 9     | 9   | >0-1 ULN, >1.5-2 ULN, >3 ULN |
| <b>Total</b>                   | 15    | 35  |                              |

ULN: upper limit of normal

Supplementary Table S4. Simulated effect of acetaminophen monotherapy on % absolute liver abnormality event.

| Treatment                 | Dose (mg/day) | Threshold  | % Liver abnormality (95% CI) |
|---------------------------|---------------|------------|------------------------------|
| <b>Acetaminophen</b>      | 1500-4000     | >0-1 ULN   | 29.06 (24.31, 33.58)         |
| <b>Other drugs*</b>       | NA            | >0-1 ULN   | 29.02 (24.29, 33.55)         |
| <b>Placebo/background</b> | NA            | >0-1 ULN   | 5.48 (3.73, 7.55)            |
| <b>Acetaminophen</b>      | 1500-4000     | >1.5-2 ULN | 1.95 (1.15, 3.05)            |
| <b>Other drugs*</b>       | NA            | >1.5-2 ULN | 1.9 (1.1, 3.07)              |
| <b>Placebo/background</b> | NA            | >1.5-2 ULN | 0.6 (0.36, 1.17)             |
| <b>Acetaminophen</b>      | 1500-4000     | >3 ULN     | 0.26 (0.08, 0.64)            |
| <b>Other drugs*</b>       | 150           | >3 ULN     | 0.22 (0, 0.66)               |
| <b>Placebo/background</b> | NA            | >3 ULN     | 0.25 (0.11, 0.54)            |

CI: confidence interval; ULN: upper limit of normal

\*Others drugs include diclofenac, ibuprofen, levobunolol and naproxen. Values are mean parameter estimates based on maximum likelihood model predictions, with 95% CI of resampling parameter estimates from the final model variance-covariance matrix 1000 times

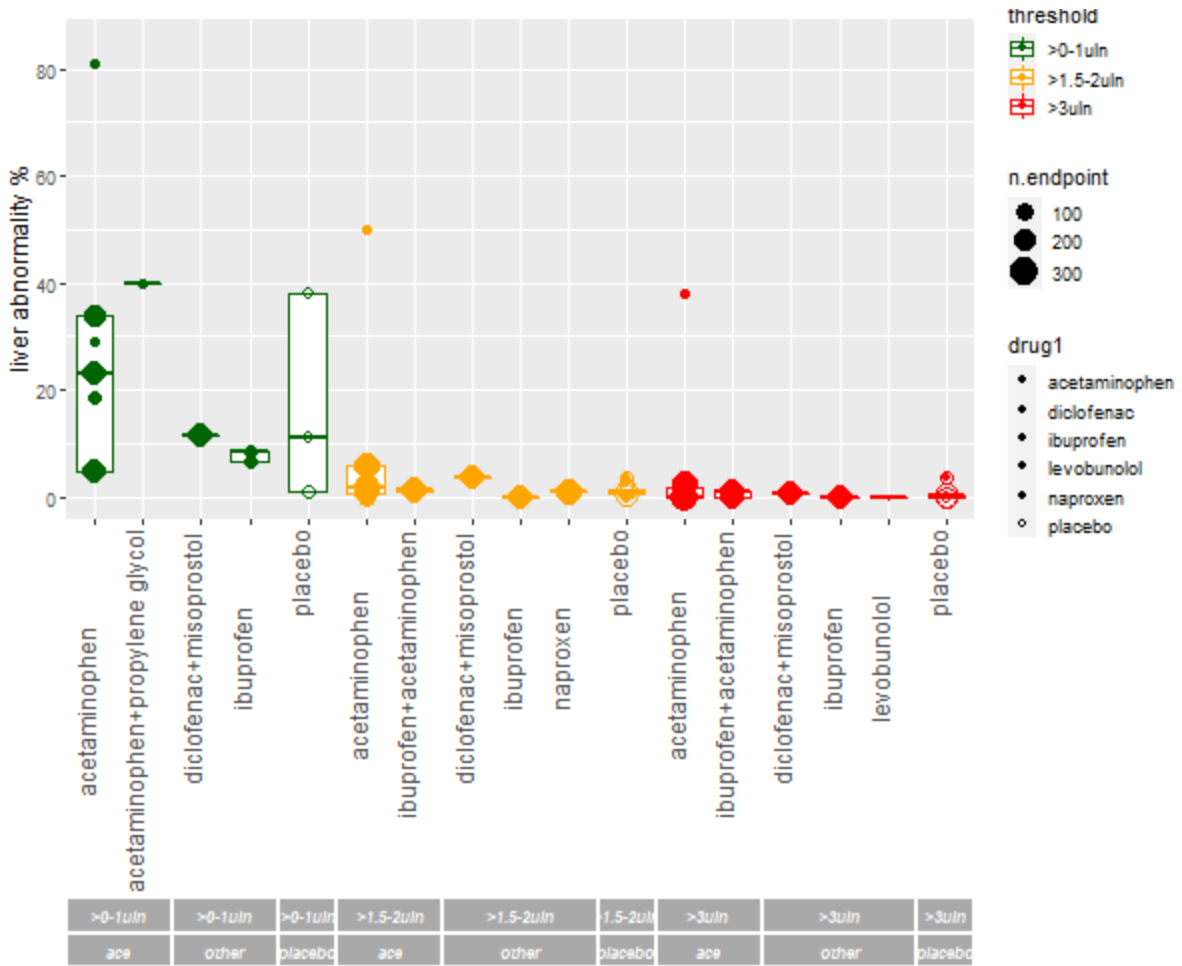

Supplementary Figure S1. Reported liver abnormality event rate, stratified by severity (threshold) and treatment arm. The box plot depicts the sample size weighted median. Dots describe each reported liver abnormality by treatment arm and threshold. Symbol size is proportional to the sample size in each treatment arm. Green symbol: >0-1 ULN elevation; yellow symbol: 1.5-2 ULN elevation; red symbol: >3 ULN elevation. ULN: Upper limit of normal.

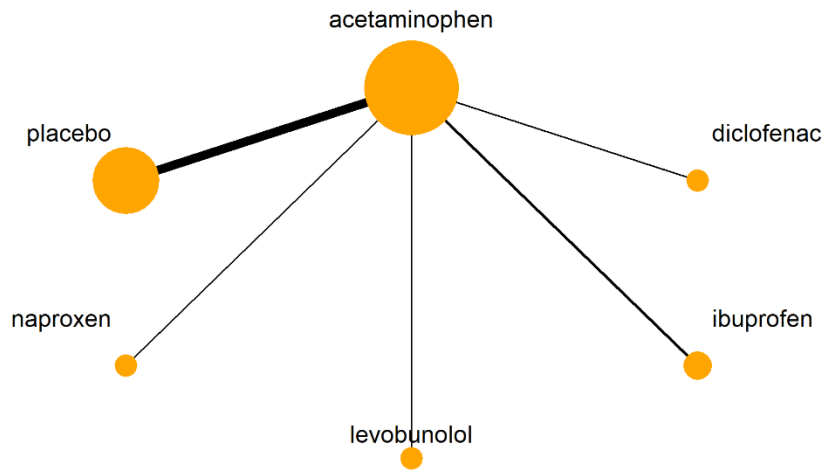

Supplementary Figure S2. Primary/first treatment network plot of included 15 RCTs reporting liver abnormality. Levobunolol was administered topically; remaining treatments were administered orally. The width of solid lines represents the number of clinical trials.

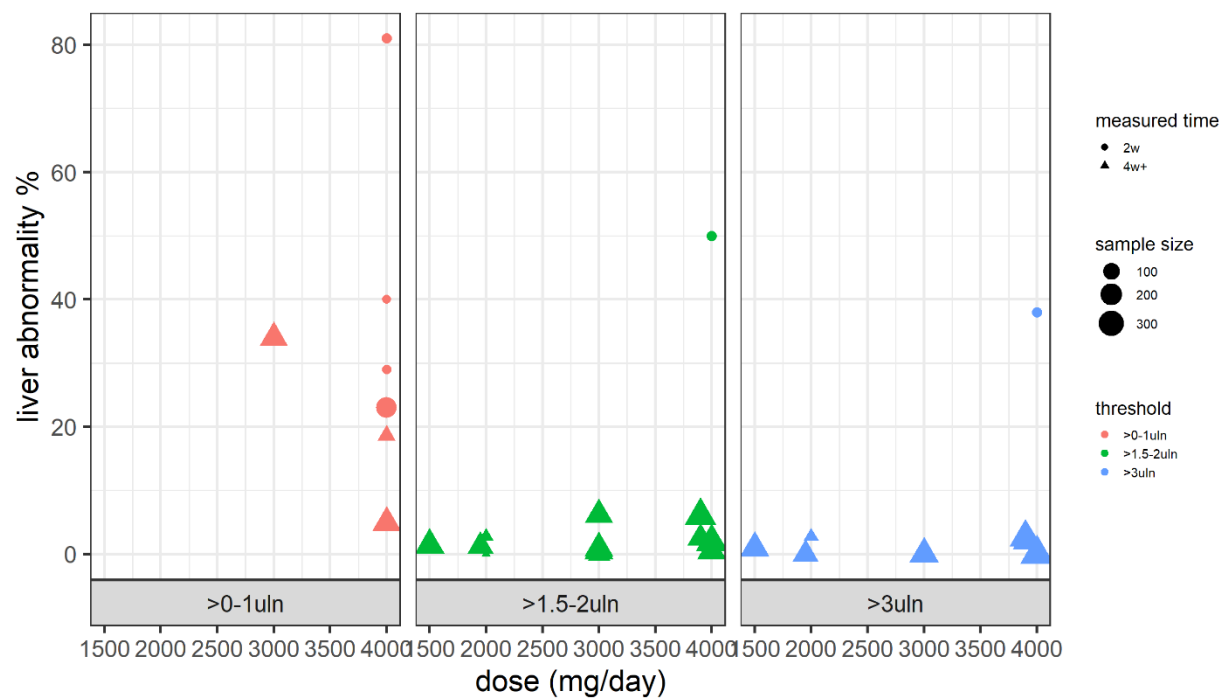

Supplementary Figure S3. Reported liver abnormality event by acetaminophen daily dose across 20 treatment arms. Red symbol: >0-1 ULN elevation; green symbol: >1.5-2 ULN elevation; blue symbol: >3 ULN elevation. ULN: Upper limit of normal



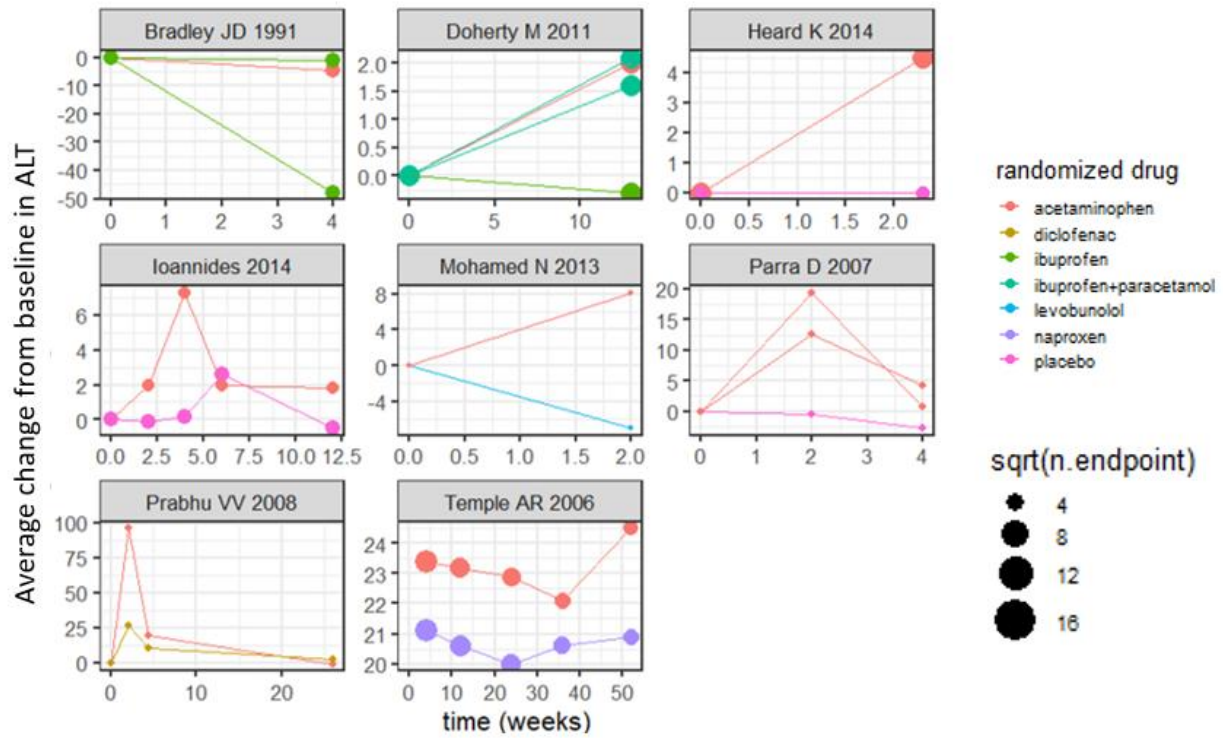

Supplementary Figure S4. Time course of changes in liver ALT concentrations in plasma for various studies with acetaminophen. Study “Temple AR 2006” reported absolute ALT value at given time points and hence reported no change from baseline due to missing baseline value. ALT: alanine transaminase

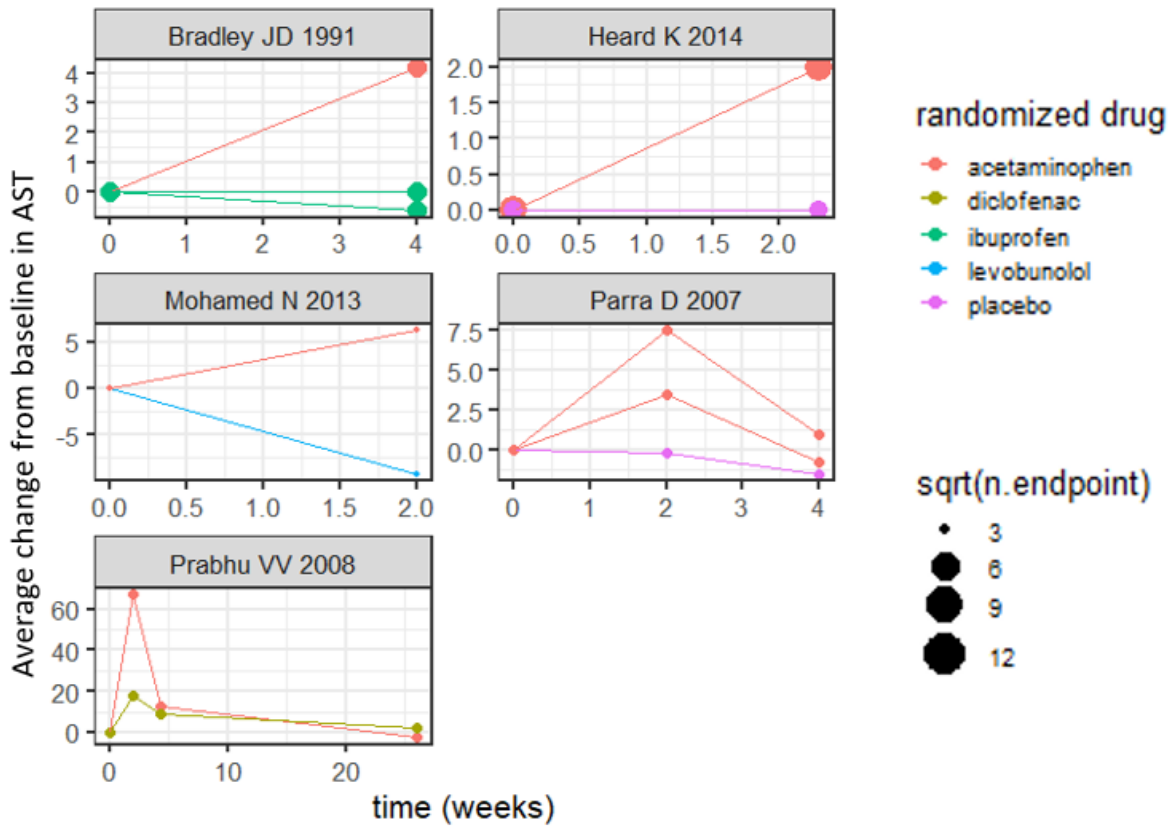

Supplementary Figure S5. Time course of changes in liver AST concentrations in plasma for various studies with acetaminophen. AST: Aspartate transaminase
